# Supplementary material
Source: HighWire-hosted journal article supplement (https://www.cmaj.ca/highwire/filestream/75002/field_highwire_adjunct_files/0/191292-annexe_2.pdf)
Supplement: 191292-annexe_2.pdf [file 191292-annexe_2.pdf]

## Annexe 2 (telle que soumise par les auteurs) : Tableau supplémentaire 1 – Définitions des types de cancer

| Cancer                                             | CIM-O-3 Siège/type                                                                                                                                                                                                                                      | CIM-9                                                                                                                                                                                       | CIM-10                                                  | CIM-9                                                                                                                                                                                       |
|----------------------------------------------------|---------------------------------------------------------------------------------------------------------------------------------------------------------------------------------------------------------------------------------------------------------|---------------------------------------------------------------------------------------------------------------------------------------------------------------------------------------------|---------------------------------------------------------|---------------------------------------------------------------------------------------------------------------------------------------------------------------------------------------------|
|                                                    | Incidence (1992 à 2015)                                                                                                                                                                                                                                 | Incidence (1984 à 1991)                                                                                                                                                                     | Mortalité (2000 à 2015)                                 | Mortalité (1984 à 1999)                                                                                                                                                                     |
| Bouche                                             | C00-C14                                                                                                                                                                                                                                                 | 140–149                                                                                                                                                                                     | C00-C14                                                 | 140–149                                                                                                                                                                                     |
| Œsophage                                           | C15                                                                                                                                                                                                                                                     | 150                                                                                                                                                                                         | C15                                                     | 150                                                                                                                                                                                         |
| Estomac                                            | C16                                                                                                                                                                                                                                                     | 151                                                                                                                                                                                         | C16                                                     | 151                                                                                                                                                                                         |
| Colorectal                                         | C18-C20, C26.0                                                                                                                                                                                                                                          | 153, 159.0, 154.0, 154.1                                                                                                                                                                    | C18-C20, C26.0                                          | 153, 159.0, 154.0, 154.1                                                                                                                                                                    |
| Foie                                               | C22.0                                                                                                                                                                                                                                                   | 155                                                                                                                                                                                         | C22.0, C22.2- C22.7                                     | 155                                                                                                                                                                                         |
| Pancréas                                           | C25                                                                                                                                                                                                                                                     | 157                                                                                                                                                                                         | C25                                                     | 157                                                                                                                                                                                         |
| Larynx                                             | C32                                                                                                                                                                                                                                                     | 161                                                                                                                                                                                         | C32                                                     | 161                                                                                                                                                                                         |
| Poumon et bronches (poumon)                        | C34                                                                                                                                                                                                                                                     | 162.2, 162.3, 162.4, 162.5, 162.8, 162.9                                                                                                                                                    | C34                                                     | 162.2, 162.3, 162.4, 162.5, 162.8, 162.9                                                                                                                                                    |
| Mélanome                                           | C44 (Type 8720-8790)                                                                                                                                                                                                                                    | 172                                                                                                                                                                                         | C43                                                     | 172                                                                                                                                                                                         |
| Sein                                               | C50                                                                                                                                                                                                                                                     | 174, 175                                                                                                                                                                                    | C50                                                     | 174, 175                                                                                                                                                                                    |
| Col de l'utérus                                    | C53                                                                                                                                                                                                                                                     | 180                                                                                                                                                                                         | C53                                                     | 180                                                                                                                                                                                         |
| Utérus (corps, SAI)                                | C54-C55                                                                                                                                                                                                                                                 | 179, 182                                                                                                                                                                                    | C54-C55                                                 | 179, 182                                                                                                                                                                                    |
| Ovaire                                             | C56.9                                                                                                                                                                                                                                                   | 183                                                                                                                                                                                         | C56                                                     | 183                                                                                                                                                                                         |
| Prostate                                           | C61.9                                                                                                                                                                                                                                                   | 185                                                                                                                                                                                         | C61                                                     | 185                                                                                                                                                                                         |
| Testicule                                          | C62                                                                                                                                                                                                                                                     | 186                                                                                                                                                                                         | C62                                                     | 186                                                                                                                                                                                         |
| Vessie (y compris <i>in situ</i> pour l'incidence) | C67                                                                                                                                                                                                                                                     | 188, 233.7                                                                                                                                                                                  | C67                                                     | 188                                                                                                                                                                                         |
| Rein et bassinnet du rein                          | C64.9, C65.9                                                                                                                                                                                                                                            | 189.0, 189.1                                                                                                                                                                                | C64-C65                                                 | 189.0, 189.1                                                                                                                                                                                |
| Encéphale/SNC                                      | C70-C72                                                                                                                                                                                                                                                 | 191, 192                                                                                                                                                                                    | C70-C72                                                 | 191, 192                                                                                                                                                                                    |
| Thyroïde                                           | C73.9                                                                                                                                                                                                                                                   | 193                                                                                                                                                                                         | C73                                                     | 193                                                                                                                                                                                         |
| Lymphome de Hodgkin*                               | Type 9650-9667                                                                                                                                                                                                                                          | 201                                                                                                                                                                                         | C81                                                     | 201                                                                                                                                                                                         |
| Lymphome non hodgkinien*                           | Type 9590-9597, 9670-9719, 9724–9729, 9735, 9737, 9738<br>Type 9811-9818, 9823, 9827, 9837 tous les sièges sauf C42.0, 42.1, 42.4.                                                                                                                      | 200, 202.0, 202.1, 202.2, 202.8, 202.9                                                                                                                                                      | C82-C86, C96.3                                          | 200, 202.0, 202.1, 202.2, 202.8, 202.9                                                                                                                                                      |
| Myélome multiple*                                  | Type 9731, 9732, 9734                                                                                                                                                                                                                                   | 203.0, 238.6                                                                                                                                                                                | C90.0, C90.2, C90.3                                     | 203.0, 238.6                                                                                                                                                                                |
| Leucémie*                                          | Type 9733, 9742, 9800-9801, 9805–9809, 9820, 9826, 9831–9836, 9840, 9860–9861, 9863, 9865–9867, 9869–9876, 9891, 9895–9898, 9910, 9911, 9920, 9930–9931, 9940, 9945–9946, 9948, 9963–9964<br>Type 9811-9818, 9823, 9827, 9837 sièges C42.0, 42.1, 42.4. | 204.0, 204.1, 205.0, 207.0, 207.2, 205.1, 202.4, 204.2, 204.8, 204.9, 205.2, 205.3, 205.8, 205.9, 206.0, 206.1, 206.2, 206.8, 206.9, 203.1, 207.1, 207.8, 208.0, 208.1, 208.2, 208.8, 208.9 | C91–C95, C90.1                                          | 202.4, 203.1, 204.0, 204.1, 204.2, 204.8, 204.9, 205.0, 205.1, 205.2, 205.3, 205.8, 205.9, 206.0, 206.1, 206.2, 206.8, 206.9, 207.0, 207.2, 207.1, 207.8, 208.0, 208.1, 208.2, 208.8, 208.9 |
| Tous les autres cancers                            | Tous les sièges C00-C80 non mentionnés précédemment                                                                                                                                                                                                     | Tous les sièges 140-209 non mentionnés précédemment                                                                                                                                         | Tous les sièges C00-C80 non mentionnés précédemment C97 | Tous les sièges 140- 209 non mentionnés précédemment                                                                                                                                        |
| Tous les cancers                                   | Tous les cancers infiltrants                                                                                                                                                                                                                            | Tous les cancers infiltrants                                                                                                                                                                | Tous les cancers infiltrants                            | Tous les cancers infiltrants                                                                                                                                                                |

SNC = système nerveux central; SAI = sans autre indication

\*Les types histologiques 9590–9992 (leucémie, lymphomes et myélome multiple), 9050–9055 (mésothéliome) et 9140 (sarcome de Kaposi) de la CIM-O-3 ne sont pas pris en compte dans les autres sièges particuliers.

**Remarque :** « CIM-O-3 » fait référence à la *Classification internationale des maladies pour l'oncologie, troisième édition*. «

CIM-10-CA » se rapporte à la *Classification statistique internationale des maladies et problèmes de santé connexes, dixième révision*. « CIM-9 » fait référence à la *Classification internationale des maladies et problèmes de santé connexes, neuvième révision*.
